# Adsorption of Cu(II) on Oxidized Multi-Walled Carbon Nanotubes in the Presence of Hydroxylated and Carboxylated Fullerenes

Jing Wang<sup>1</sup>, Zhan Li<sup>2</sup>, Shicheng Li<sup>3</sup>, Wei Qi<sup>1</sup>, Peng Liu<sup>1</sup>, Fuqiang Liu<sup>1</sup>, Yuanlv Ye<sup>1</sup>, Liansheng Wu<sup>1</sup>, Lei Wang<sup>1</sup>, Wangsuo Wu<sup>1\*</sup>

**1** Radiochemistry Laboratory, School of Nuclear Science and Technology, Lanzhou University, Lanzhou, PR China, **2** Institute of Modern Physics, Chinese Academy of Sciences, Lanzhou, PR China, **3** Institute of Nuclear Physics and Chemistry, China Academy of Engineering Physics, Mianyang, PR China

## Abstract

The adsorption of Cu(II) on oxidized multi-walled carbon nanotubes (oMWCNTs) as a function of contact time, pH, ionic strength, temperature, and hydroxylated fullerene ( $C_{60}(OH)_n$ ) and carboxylated fullerene ( $C_{60}(C(COOH)_2)_n$ ) were studied under ambient conditions using batch techniques. The results showed that the adsorption of Cu(II) had rapidly reached equilibrium and the kinetic process was well described by a pseudo-second-order rate model. Cu(II) adsorption on oMWCNTs was dependent on pH but independent of ionic strength. Compared with the Freundlich model, the Langmuir model was more suitable for analyzing the adsorption isotherms. The thermodynamic parameters calculated from temperature-dependent adsorption isotherms suggested that Cu(II) adsorption on oMWCNTs was spontaneous and endothermic. The effect of  $C_{60}(OH)_n$  on Cu(II) adsorption of oMWCNTs was not significant at low  $C_{60}(OH)_n$  concentration, whereas a negative effect was observed at higher concentration. The adsorption of Cu(II) on oMWCNTs was enhanced with increasing pH values at  $pH < 5$ , but decreased at  $pH \geq 5$ . The presence of  $C_{60}(C(COOH)_2)_n$  inhibited the adsorption of Cu(II) onto oMWCNTs at  $pH 4-6$ . The double sorption site model was applied to simulate the adsorption isotherms of Cu(II) in the presence of  $C_{60}(OH)_n$  and fitted the experimental data well.

**Citation:** Wang J, Li Z, Li S, Qi W, Liu P, et al. (2013) Adsorption of Cu(II) on Oxidized Multi-Walled Carbon Nanotubes in the Presence of Hydroxylated and Carboxylated Fullerenes. PLoS ONE 8(8): e72475. doi:10.1371/journal.pone.0072475

**Editor:** Jörg Langowski, German Cancer Research Center, Germany

**Received:** February 26, 2013; **Accepted:** July 10, 2013; **Published:** August 29, 2013

**Copyright:** © 2013 Wang et al. This is an open-access article distributed under the terms of the Creative Commons Attribution License, which permits unrestricted use, distribution, and reproduction in any medium, provided the original author and source are credited.

**Funding:** The author would like to thank the financial support from National Natural Science Foundation of China (J1030932). The funders had no role in study design, data collection and analysis, decision to publish, or preparation of the manuscript.

**Competing Interests:** The authors have declared that no competing interests exist.

\* E-mail: wuws@lzu.edu.cn

## Introduction

Carbon-based nanomaterials have been widely studied [1] as a new material with special mechanical, electrical, optical, catalytic, magnetic and photon sensitive properties. Applications for environmental pollution and biological toxicity problems should not be ignored [2,3] considering the increasing utilization of carbon-based nanomaterials in industry, agriculture, and biology.

Given their large specific surface area which can be easily functionalized, carbon nanotubes are widely used as adsorbents for removal of various heavy metal ions from aqueous solutions [4,5]. Cu(II) is a typical bivalent heavy metal pollutant which has been studied with respect to the uptake of Cu(II) onto various CNTs from water [6–13]. Chao-Yin [7] studied aqueous  $Cu^{2+}$  adsorption onto as-grown and modified carbon nanotubes and revealed that the modification of carbon nanotubes with  $H_2SO_4/KMnO_4$  increased not only the area of active adsorption sites on carbon nanotubes but also the proportion of available adsorption sites. Pyrzyńska and Bystrzejewski [8] reported that the adsorption capacity of carbon nanotubes and carbon-encapsulated magnetic nanoparticles for Cu(II) and Co(II) was greater than that of activated carbons. They deduced the primary reasons were surface charge densities, particle size effects at high ionic strengths, and overall degree of graphitization. Gao et al. [9] studied the removal

of nickel, copper, zinc, and cadmium from multi-component solutions by the oxidized multi-walled carbon nanotubes indicating that the significant factors are surface features, ion exchange, and electrochemical potential. From the literature, it is concluded that carbon nanotubes possess strong adsorption affinity for heavy metal ions. Once discharged into the environment as pollutants, carbon nanotubes inevitably are combined with heavy metal pollutants or toxic organic macromolecules through adsorption, which leads to more complicated environmental pollution problems [14,15].

In order to simulate the real effect between carbon nanotubes and heavy metal ions in the real environment, organic matter is often evaluated as one of the factors frequently studied due to its enhancement of Cu(II) adsorption onto carbon nanotubes. Organic compounds such as humic acid (HA) and fulvic acid (FA) are common in soil [16]. Noxious aromatic compounds such as the herbicide atrazine [17] and chemical materials such as acetone [18] widely found in the chemical industry. Sheng et al. [19] found that the adsorption of Cu(II) to multi-walled carbon nanotubes (MWCNTs) is significantly influenced by HA/FA and other organics. Tan et al. [20] reported counterion effects of nickel and sodium dodecylbenzene sulfonate (SDBS) adsorption to MWCNTs surfaces plays an important role in the nickel adsorption process.

Almost all of the researchers select a single kind of carbon nanomaterial as an adsorbent. However, very few researchers have reported the effect of the adsorption of metal ions on carbon nanotubes accompanied by another species of carbon nanomaterials. In fact, carbon nanomaterials as contaminants are not single structures in the environment but are an admixture of nanometer material with different sizes, structures and properties [21–23]. Therefore, it is necessary to investigate the adsorption mechanism of metal ions together with various combinations of carbon nanomaterials. It is difficult to achieve complete separation in the presence of a several species of carbon nanomaterials, so distinguishing the contribution of each carbon nanomaterial to the adsorption of metal ions is extremely difficult. Thus, we studied the three component system comprised of Cu(II) and carbon nanotubes in the presence of soluble fullerenes to evaluate the multi-component interactions.

Fullerenes ( $C_{60}$ ) are nanometer carbon materials which were widely studied prior to carbon nanotubes [24,25]. Due to special physical, optical and superconducting performance,  $C_{60}$  has promising applications for gas storage, sensors, reinforced metals, superconducting, catalysts, cancer therapy, and other medical applications [26,27]. With its well defined structure and  $\pi$  electron character [24],  $C_{60}$  readily forms  $\pi$ - $\pi$  stacking interactions with other aromatic materials [28,29]. These combined reactants then affect the adsorption of metal ions or organic matter on the composite material. Therefore, research on the three component system soluble fullerene plus Cu(II) and carbon nanotubes provides a reference for studying the other reactions between carbon nanomaterials and metal ions in various natural conditions. The study of the three component system also provides a theoretical basis for studying biological safety problems caused by multicomponent environment pollution.

## Experimental Process

### Materials

MWCNTs (prepared by chemical vaporization deposition) were purchased from Shenzhen Nanotech Port Co., Ltd. China, with an outer diameter range of 10–30 nm, 1–10  $\mu$ m in length, and a purity above 96% (including amorphous carbon <3%, ash <0.2%). Oxidized MWCNTs were prepared by oxidization with concentrated nitric acid-sulfuric acid (1:3, V/V). The as-prepared MWCNTs were immersed in a 500 mL flask containing 400 mL concentrated nitric acid and refluxed at 80°C for 24 h, and then washed by deionized water. After cleaning, the MWCNTs were re-dispersed in a mixture of 400 mL concentrated nitric acid and concentrated sulfuric acid (1:3, V/V) and refluxed for 48 h at 80°C. Finally, the treated MWCNTs were filtered and washed to obtain oxidized MWCNTs (oMWCNTs).

Fullerenes ( $C_{60}$ ), purity >99%, were purchased from Henan Puyang Yongxin Fullerene Technology Co., LTD.  $C_{60}(\text{OH})_n$  ( $n = 2\sim 24$ ) was synthesized as given in a reported procedure [30]. 50 mg  $C_{60}$  was dissolved in 50 mL benzene, followed by additions of 2 mL of 2 mol/L NaOH, 5 drops of Tetra-Butyl-Ammonium Hydroxide (TBAH, 40% in water), and 5 mL 30%  $\text{H}_2\text{O}_2$ . This mixture was stirred at room temperature for 2 hours. After removal of benzene by separatory funnel, 20 mL methanol was added to produce a yellowish brown precipitate which was dissolved in aqueous solution. The above procedures were repeated 4–5 times in order to completely remove TBAH and NaOH. Drying the precipitate under reduced pressure below 50°C yielded a yellow brown product. The sample was then dissolved in water, laid aside overnight, and then methanol was added to produce a precipitate. The fullerol was thus obtained by

drying the precipitate under reduced pressure below 50°C. Synthesis of  $C_{60}$  water soluble di-malonic acid derivative  $C_{60}(\text{C}(\text{COOH})_2)_n$  has been described in the literature [31]. After NaH was added to the solution of  $C_{60}$  in toluene, the solution changed from purple to dark red. Next diethyl bromomalonate was added. After vacuum and stirring under argon protection for 10h, the solution was filtered in order to remove the precipitate, and the solvent was removed in vacuum. The residue was eluted by toluene, and then 20 fold excess NaH was added. The solution was stirred under argon at 80°C for 10 h. After the heating source was removed, methanol was added for reaction termination followed by addition of HCl. The solution was cooled in air. The precipitate was collected by centrifugation, and thus washed with methanol, HCl, and deionized water and repeated twice. Finally, the resulting filtrate was dried in vacuum. The brown dried powder was  $C_{60}(\text{C}(\text{COOH})_2)_n$ .

All chemicals were of analytical reagent grade and all solutions were prepared with deionized water.

### Characterization

The changes in morphology and features of oMWCNTs before and after Cu(II) adsorption in the presence of two species of soluble fullerene were characterized by transmission electron microscope (TEM, Tecnai<sup>TM</sup> G<sup>2</sup> F30, FEI, US). The specific surface area of the oMWCNTs was measured using the Brunauer–Emmett–Teller nitrogen physisorption method ( $\text{N}_2$ -BET), using a Surface Area and Porosity Analyzer (ASAP 2020M, Micromeritics Instrument Corporation, USA). Fourier transform infrared Spectroscopy (FTIR, Nexus670, Thermo Nicolet, American) was used in the analysis of the chemical surface groups of oMWCNTs. The resolution was  $1\text{ cm}^{-1}$ . The detector was DTGS KBr with working range between 400 and  $4000\text{ cm}^{-1}$ . The structural information of oMWCNTs was evaluated by a Raman spectroscopy (Jobin-Yvon LabRam HR80, HORIBA Ltd., France) with 514 nm laser. The zeta potential of oMWCNTs after  $C_{60}(\text{OH})_n$  and  $C_{60}(\text{C}(\text{COOH})_2)_n$  adsorption were measured using a Zetasizer Nano ZS (Nano ZS ZEN3600, Malvern Instruments Ltd, Britain). The pH values of oMWCNTs solution were adjusted 6 by adding 0.1 M HCl to the glass beaker at 298K. For the FTIR and  $\text{N}_2$ -BET analysis, the samples were equilibrated for 2 days and then centrifugation followed by washing with blank electrolyte to remove unbound soluble fullerene and Cu(II). The samples were then dried at 50°C.

### Adsorption experiments

The adsorption of Cu(II) on oMWCNTs was investigated by using a batch technique in a 10 mL polyethylene centrifuge tube. The stock solutions of oMWCNTs and NaCl were pre-equilibrated for 24 h and then Cu(II) stock solution was added to achieve the desired concentrations. The system was adjusted to the desired pH by adding negligible volumes of 0.01 or 0.1  $\text{mol}\cdot\text{L}^{-1}$  HCl or NaOH. After the suspensions were equilibrated for 2 days (which was enough to achieve equilibrium), the solid and liquid phases were separated by using centrifugation at 12,000 rpm for 30 min. The residual Cu(II) concentrations were determined at 540 nm with UV-VIS spectrophotometry (Perkin-Elmer, American). The adsorbed quantity of Cu(II) was calculated from the difference between the initial concentration and that at equilibrium.

Adsorption isotherms were developed using the batch technique in polyethylene centrifuge tubes under ambient conditions at 293, 313, and 333 K, respectively. The stock solutions of 0.01 mol/L NaCl and 0.5 g/L oMWCNTs were pre-equilibrated for 24 h before addition of Cu(II) stock solution. The initial concentrations of Cu(II) were from 1.0 to 20.0 mg/L.

The effects of  $C_{60}(OH)_n/C_{60}(C(COOH)_2)_n$  concentration on Cu(II) adsorption was also investigated. The stock solutions of oMWCNTs,  $C_{60}(OH)_n/C_{60}(C(COOH)_2)_n$ , and NaCl were pre-equilibrated for 24 h before adding the Cu(II) stock solution. The experimental sequences were as follows: (1) oMWCNTs,  $C_{60}(OH)_n/C_{60}(C(COOH)_2)_n$  and NaCl were pre-equilibrated before the addition of Cu(II) (defined as (oMWCNTs+ $C_{60}(OH)_n/C_{60}(C(COOH)_2)_n$ )+Cu); (2) oMWCNTs, Cu(II) and NaCl were pre-equilibrated before the addition of  $C_{60}(OH)_n/C_{60}(C(COOH)_2)_n$  (defined as (oMWCNTs+Cu)+ $C_{60}(OH)_n/C_{60}(C(COOH)_2)_n$ ); (3)  $C_{60}(OH)_n/C_{60}(C(COOH)_2)_n$ , Cu(II) and NaCl were pre-equilibrated before the addition of oMWCNTs (defined as ( $C_{60}(OH)_n/C_{60}(C(COOH)_2)_n$ +Cu)+oMWCNTs).

## Results and Discussion

### Characterization of purified oMWCNTs, $C_{60}(OH)_n$ and $C_{60}(C(COOH)_2)_n$

Figure 1 shows TEM photomicrographs of oMWCNTs,  $C_{60}(OH)_n$ -oMWCNTs dispersion, and  $C_{60}(C(COOH)_2)_n$ -oMWCNTs dispersion in aqueous solution, respectively. Carbon nanotubes (Figure 1A) have an integrated hollow tubular structure after oxidation, indicating that their surfaces are smooth, without any obvious amorphous carbon and other particles on their walls. For the sample of  $C_{60}(OH)_n$ -oMWCNTs dispersion (Figure 1B), some particles (seen the represent of arrow in Figure 1B) persisted on the walls of CNTs. It can be discerned that  $C_{60}(OH)_n$  particles are heterogeneously attached to the surface of oMWCNTs. As can be seen from Figure 1C, the surface of oMWCNTs are not coated with  $C_{60}(C(COOH)_2)_n$ . This may be attributed to differences in functional substitution on the surface of  $C_{60}$ .

The surface area, mesopore volumes, and pore size (Table 1) are  $100 \text{ m}^2/\text{g}$ ,  $0.34 \text{ cm}^3/\text{g}$ , and  $13.326 \text{ nm}$ , respectively.

Figure 2 presents the FTIR spectra of modified CNTs. The peak at  $3429 \text{ cm}^{-1}$  can be assigned to  $-OH$  stretching vibration mode of carboxylic groups ( $-COOH$  and  $-COH$ ), while the peaks at  $2922$  and  $2853 \text{ cm}^{-1}$  can be related to the asymmetric and symmetric  $-CH$  stretching vibration mode of the sidewalls, the peak at  $1734 \text{ cm}^{-1}$  can be attributed to stretching vibrations of carbonyl groups ( $C=O$ ) present in carboxylic groups ( $-COOH$ ). The spectra of conjugated  $C=C$  stretching bands appeared at about  $1628$  and  $1418 \text{ cm}^{-1}$ , the peak at  $1561 \text{ cm}^{-1}$  is associated with the carboxylic and carboxylate anion stretching mode, the peak between  $1000$  and  $1380 \text{ cm}^{-1}$  can be attributed to  $C-O$

**Table 1.** Characteristics of the porous structure of the oMWCNTs.

| Sample  | $S_{BET}(\text{m}^2/\text{g})$ | Total pore volumes ( $\text{cm}^3/\text{g}$ ) | Pore size (nm) |
|---------|--------------------------------|-----------------------------------------------|----------------|
| oMWCNTs | 100                            | 0.34                                          | 13.326         |

doi:10.1371/journal.pone.0072475.t001

stretching and  $-OH$  bending modes of alcoholic, phenolic and carboxylic groups [32,33].

Figure 3 shows the FTIR spectrum of raw  $C_{60}$ ,  $C_{60}(OH)_n$  and  $C_{60}(C(COOH)_2)_n$ , respectively. For  $C_{60}(OH)_n$  (Figure 3B), the FTIR shows a broad hydroxyl adsorption centered at  $3234 \text{ cm}^{-1}$ , the peak at  $1609 \text{ cm}^{-1}$  can be assigned to the  $C=C$  stretching vibration mode. The peak at  $1086$  and  $1365 \text{ cm}^{-1}$  are related to  $C-O$  stretching vibration mode and  $-OH$  in-plane bending vibration mode. These peaks are all the infrared characteristic peaks of  $C_{60}(OH)_n$  [34]. The FTIR spectrum of  $C_{60}(C(COOH)_2)_n$  (Figure 3C) exhibits main peaks at  $3439$ ,  $1718$ ,  $1201$  and  $523 \text{ cm}^{-1}$ . A previous report [35] suggested that hydroxyl

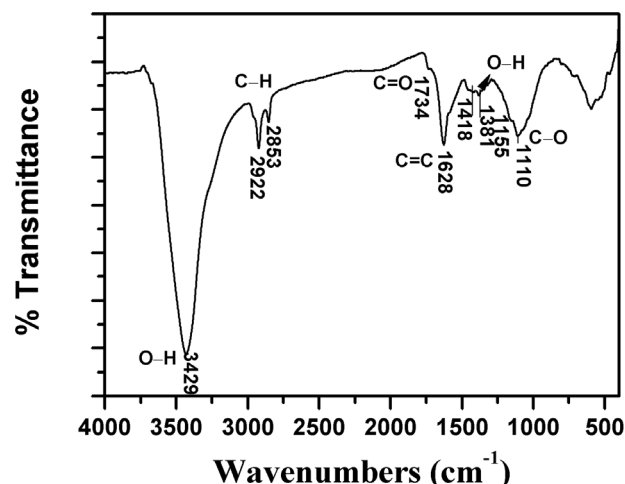

**Figure 2.** FTIR spectrum of oMWCNTs.

doi:10.1371/journal.pone.0072475.g002

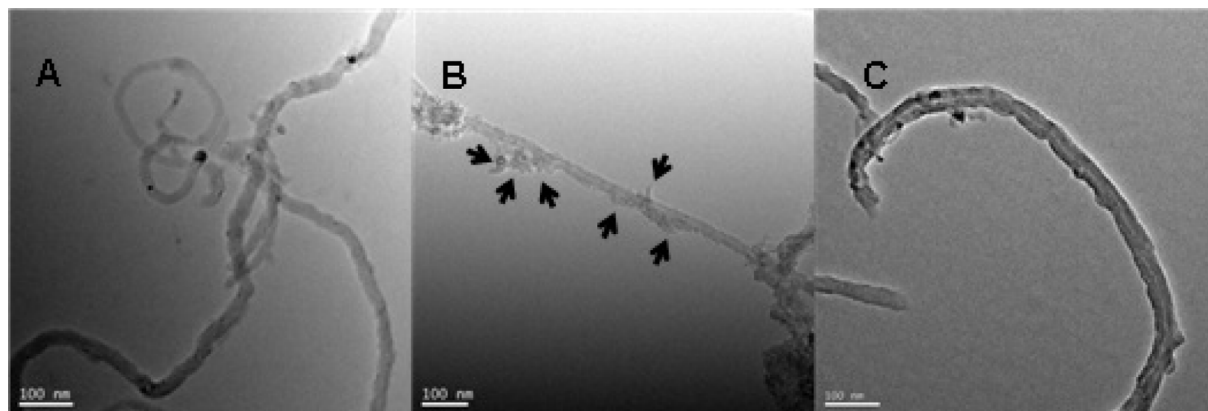

**Figure 1.** TEM photographs of (A) oMWCNTs; (B) oMWCNTs+ $C_{60}(OH)_n$ ; (C) oMWCNTs +  $C_{60}(C(COOH)_2)_n$ .

doi:10.1371/journal.pone.0072475.g001

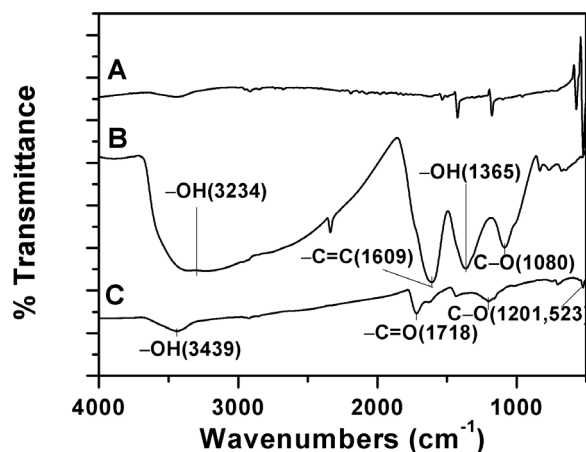

**Figure 3. FTIR spectrum of (A) raw  $C_{60}$ ; (B)  $C_{60}(\text{OH})_n$ ; (C)  $C_{60}(\text{C}(\text{COOH})_2)_n$ .**  
doi:10.1371/journal.pone.0072475.g003

(-OH), carbonyl ( $>\text{C}=\text{O}$ ) and carboxyl ( $-\text{C}-\text{O}$ ) were present on the surfaces of  $C_{60}(\text{C}(\text{COOH})_2)_n$ .

FTIR is also conducted on oMWCNTs after  $C_{60}(\text{OH})_n/C_{60}(\text{C}(\text{COOH})_2)_n$  adsorption and their corresponding spectra are shown in Figure S1 in File S1. It can be seen that after adsorption, the same infrared absorptions still remained.  $C_{60}(\text{OH})_n$  adsorbed on oMWCNTs (Figure C in File S1) exhibit there are increase in intensity of same bands at  $2922$  and  $2853\text{ cm}^{-1}$  (assigned to asymmetric and symmetric  $\text{CH}_2$  stretching),  $1734\text{ cm}^{-1}$  (assigned to  $\text{C}=\text{O}$  stretching vibrations),  $1628$  and  $1418\text{ cm}^{-1}$  (assigned to  $\text{C}-\text{O}$  stretching). The new peak at  $1404\text{ cm}^{-1}$  can be assigned to aliphatic hydroxyl bending. These changes may be result from  $C_{60}(\text{OH})_n$  adsorbed on the surface of oMWCNTs [32].

Raman spectroscopy of oMWCNTs presents in Figure 4 are composed of two characteristic peaks. The peak near  $1350\text{ cm}^{-1}$  is the D-band corresponding to the disordered  $\text{sp}^2$ -hybridized carbon atoms of nanotubes while the peak near  $1580\text{ cm}^{-1}$  is the G-band corresponding to the structural integrity of  $\text{sp}^2$ -hybridized carbon atoms of nanotubes [19]. As can be observed, the G-band of oMWCNTs shows an increase after  $C_{60}(\text{OH})_n$  adsorption. The G band is due to the bond stretching of both aromatic and aliphatic  $\text{C}-\text{C}$  pairs [36–38]. This suggests that oMWCNTs exit more crystalline graphitic structures after the adsorption  $C_{60}(\text{OH})_n$ . Figure S3 and Figure S4 in File S1 plot the zeta potential of oMWCNTs. All of zeta potentials of oMWCNTs become more negative as the concentration of  $C_{60}(\text{OH})_n/C_{60}(\text{C}(\text{COOH})_2)_n$  increased. Meanwhile the change of oMWCNTs zeta potential with increasing of  $C_{60}(\text{OH})_n$  concentration is more regular than that with increasing of  $C_{60}(\text{C}(\text{COOH})_2)_n$  concentration. This demonstrates that the zeta potential of oMWCNTs have been changed by  $C_{60}(\text{OH})_n$  adsorbed. Figure S5 in File S1 shows photographs of oMWCNTs and  $C_{60}(\text{OH})_n/C_{60}(\text{C}(\text{COOH})_2)_n$  solutions after centrifugation. The solid and liquid phases are separated by using centrifugation for samples “A” to “G”. Interestingly, it is noticed that somewhat better dispersion is achieved for sample “G”, which is consistent with the analysis of the oMWCNTs zeta potential (seen in Figure S3 and Figure S4 in File S1). Therefore, it is clear that the presence of  $C_{60}(\text{OH})_n$  can promotes oMWCNTs dispersion in adsorption system.

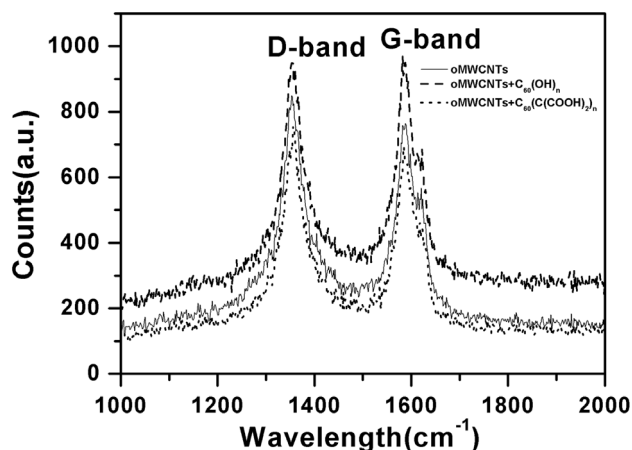

**Figure 4. Raman spectra of oMWCNTs before and after  $C_{60}(\text{OH})_n/C_{60}(\text{C}(\text{COOH})_2)_n$  adsorption.**  
doi:10.1371/journal.pone.0072475.g004

### Adsorption of Cu(II) on the oMWCNTs

Figure 5 shows the effect of contact time on the adsorption capacity of Cu(II) on the surface of oMWCNTs and the initial concentration of Cu(II) is  $12\text{ mg/L}$ . As can be seen, the adsorption of Cu(II) onto oMWCNTs increases very quickly at the initial contact, then the adsorption remains at a steady state with increasing time after 5 h. The adsorption of Cu(II) mainly occurs with the surface functional groups of oMWCNTs. The ability of oMWCNTs to remove metal ions from aqueous solution is enhanced due to the strong interaction between Cu(II) and functional groups of oMWCNTs. The markedly increased transport rate of Cu(II) on the surface of oMWCNTs, and the adsorption capacity becomes stable after about 5 h. This adsorption process is generally similar the process of heavy metal ion adsorption on oMWCNTs [39]. It is well known that oxidation of the carbon surface could offer not only more hydrophilic surface structure but also a large number of oxygen-containing functional groups like  $-\text{COOH}$ ,  $-\text{OH}$ , or  $-\text{C}=\text{O}$  on the surfaces of oMWCNTs, which increase the adsorption capability of the carbon material [40]. The pseudo-second-order rate equation (Eq. 1) [41] was employed to fit the adsorption data. Its general form is:

$$t/q_t = 1/k_0 q_e^2 + t/q_e \quad (1)$$

where  $q_t$  (mg/g) is the amount of Cu(II) adsorbed on oMWCNTs at time  $t$  and  $q_e$  (mg/g) is the equilibrium adsorption capacity;  $k_0$  ( $\text{g}/\text{mg}\cdot\text{h}^{-1}$ ) is the pseudo-second-order rate constant of adsorption. The straight-line plots of  $t/q_t$  vs.  $t$  (Figure 5) indicates that the kinetic adsorption of Cu(II) on oMWCNTs can be well described by the pseudo-second-order rate equation. The values of  $k_0$  and  $q_e$  are  $1.28\text{ g}/\text{mg}\cdot\text{h}^{-1}$  and  $15.13\text{ mg/g}$ , respectively. These are calculated from the intercept and slope of Eq. (1). The correlation coefficient of the pseudo-second-order rate equation for the linear plot is 0.9999, which suggests that the kinetic adsorption can be very well described by the pseudo-second-order rate equation. The value of  $k_0$  also indicates that the adsorption process rapidly achieves equilibrium [39]. Actually, the kinetic adsorption data have been simulated with first-order reversible model, pseudo-first-order model, pseudo-second-order model, and intraparticle diffusion model, respectively. The results have been listed in Table S3 in File S1. From the values of  $R^2$ , the kinetic adsorption of Cu(II) can be fitted by the four models. However, pseudo-

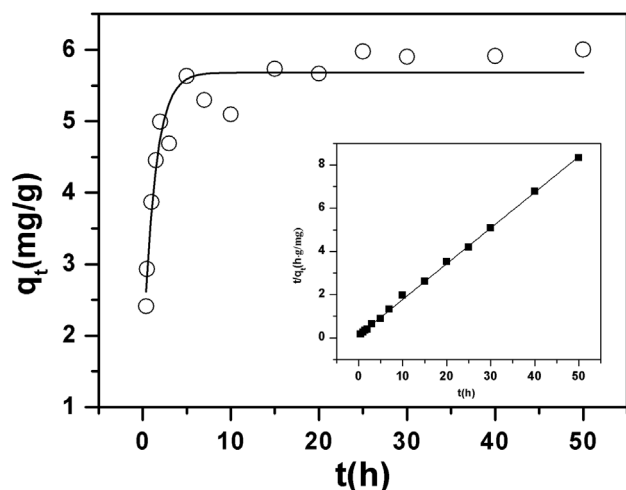

**Figure 5. Effect of contact time on Cu(II) adsorption rate onto oMWCNTs and test of pseudo-second-order adsorption kinetics plot for Cu(II),  $m/V = 0.5$  g/L,  $T = 25 \pm 1^\circ\text{C}$ ,  $C[\text{Cu}^{2+}]_{\text{initial}} = 1.87 \times 10^{-4}$  mol/L,  $I = 0.01$  mol/L NaCl,  $\text{pH} = 4.00 \pm 0.05$ .**  
doi:10.1371/journal.pone.0072475.g005

second-order model fitted the experimental data best among the four models. A similar results were also observed by Xu et al. [39] and Hu et al. [42]. According to the above results, the shaking time was fixed for 48 h for the rest of the batch experiments to assure that equilibrium was fully reached.

Solution pH is one of the important factors in controlling the adsorption experiments. Figure 6 shows the influence of pH from 2 to 10 on the adsorption of Cu(II) onto oMWCNTs in 0.001, 0.01 and 0.1 mol·L<sup>-1</sup> NaCl solution. Cu(II) adsorption is strongly influenced by the system pH values. The adsorption percentage of Cu(II) increases sharply to about 96% at pH < 6.5, and then maintains a high level state with pH > 6.5. This is similar to the Cu(II) adsorption on the other materials [43–45]. Yang et al. [46] investigated the adsorption of Ni(II) on oMWCNTs and obtained similar results. They found that the adsorption of Ni(II) increased from 0% to 99% at pH 2–9, and then maintained the same high adsorption capacity with significantly increasing pH. The adsorption properties of oMWCNTs can be explained by the surface charge and the chemical properties of oMWCNTs [47]. The point of zero charge ( $\text{pH}_{\text{pzc}}$ ) of oMWCNTs is about 5 [19,48]. In the aqueous system, the surface charge of oMWCNTs is positive at  $\text{pH} < \text{pH}_{\text{pzc}}$  because of protonation, whereas the surface becomes negative due to deprotonation at  $\text{pH} > \text{pH}_{\text{pzc}}$ . With increasing pH, the sorption of Cu(II) increases due to the electrostatic attraction between the positive metal ions and the negative functional groups of oMWCNTs. Additionally, the distribution of Cu(II) species in solution is another important factor for pH dependent adsorption. Under the present experimental conditions, Cu(II) species can be present in the forms of  $\text{Cu}^{2+}$ ,  $\text{Cu}(\text{OH})^+$ ,  $\text{Cu}_2(\text{OH})_2^{2+}$ ,  $\text{CuCO}_3(\text{aq})$ ,  $\text{Cu}(\text{CO}_3)_2^{2-}$  at its initial concentration of  $1.87 \times 10^{-4}$  mol·L<sup>-1</sup> in 0.01 mol·L<sup>-1</sup> NaCl solution (as shown in Figure S2 in File S1). When pH is  $\leq 6.5$ , the predominant species is  $\text{Cu}^{2+}$  and the extraction of  $\text{Cu}^{2+}$  is nearly accomplished. When  $\text{pH} > 6.5$ , Cu(II) hydrolysis species (i.e.  $\text{Cu}(\text{OH})^+$  and  $\text{Cu}_2(\text{OH})_2^{2+}$ ) are the main form present in the solution.  $\text{CuCO}_3(\text{aq})$ , and  $\text{Cu}(\text{CO}_3)_2^{2-}$  begin to occur due to the impact of  $\text{CO}_2$  at  $\text{pH} > 7.5$ . These species have a relatively low solubility in aqueous phase, therefore Cu(II) adsorption on oMWCNTs maintains its maximum amount and remains stable.

The relationship between equilibrium pH value and initial pH is also reflected in Figure 6. The diagonal line represents that the value of pH in the adsorption process remains unchanged. However, the measured equilibrium pH values are slightly lower than the initial pH values, and decreases as the initial pH value increases. This is generally interpreted as the result of the  $-\text{OH}$  group (i.e. carboxyl and phenolic hydroxyl) being deprotonated on the surface of oMWCNTs. As the solution pH increases, more and more  $\text{Cu}^{2+}$  adsorb onto oMWCNTs surfaces and releases  $\text{H}^+$  into the solution, eventually leading to the decreasing equilibrium pH value in solution. Some researchers find that the pH value decreases with increasing initial metal ion concentration. This provides evidence that metal ion adsorption onto oMWCNTs surface causes  $\text{H}^+$  to be released from the functional groups into the solution, thus explaining the decline of pH in the solution [14,49]. This explanation is consistent with our experimental results.

It can also be seen from Figure 6 that the background electrolyte concentrations have no significant effect on the adsorption of Cu(II) to oMWCNTs. This shows that  $\text{Na}^+$  in the solution is not involved in the adsorption of Cu(II) onto oMWCNTs. This is consistent with some of the results of adsorption of metal ions [50,51] reported in the literature. The adsorption mechanism can be predicted by studying the change in ionic strength on the adsorption as proposed by Hayes and Leckie [52]. They believe that the adsorption reaction occurs mainly in the  $\beta$  plane when the ionic strength has a significant effect on the adsorption. They also conclude that the adsorption mechanism is predominately ion exchange. Conversely, complexation reactions may be occurring in the  $\sigma$  plane without the influence of ionic strength. In our experiment, Cu(II) adsorption onto oMWCNTs predominately occurs in the  $\sigma$  plane. Cu(II) adsorption on oMWCNTs is strongly dependent on pH, and largely independent of ionic strength, indicating that the adsorption mechanism is mainly chemical complexation rather than ion exchange.

Figure 7 shows the isotherm for Cu(II) adsorption onto oMWCNTs. In order to describe the adsorption of Cu(II) on the oMWCNTs more accurately, the Langmuir and Freundlich models were employed to fit the experimental isotherm data. The general form of the Langmuir model is:

$$q_e = q_{\text{max}} K_L C_e / (1 + K_L C_e) \quad (2)$$

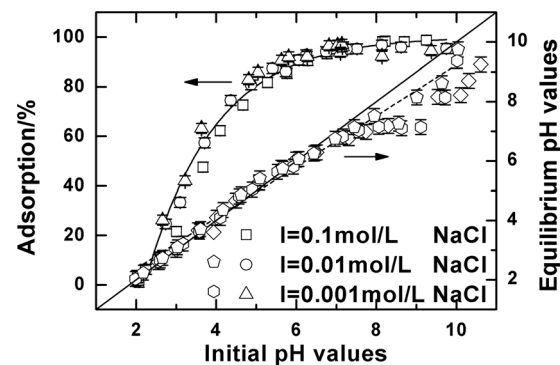

**Figure 6. Adsorption of Cu(II) on oMWCNTs as a function of pH,  $m/V = 0.5$  g/L,  $T = 25 \pm 1^\circ\text{C}$ ,  $C[\text{Cu}^{2+}]_{\text{initial}} = 1.87 \times 10^{-4}$  mol/L.** Solid points: adsorption vs. initial pH values; open points: equilibrium pH values vs. initial pH values.  
doi:10.1371/journal.pone.0072475.g006

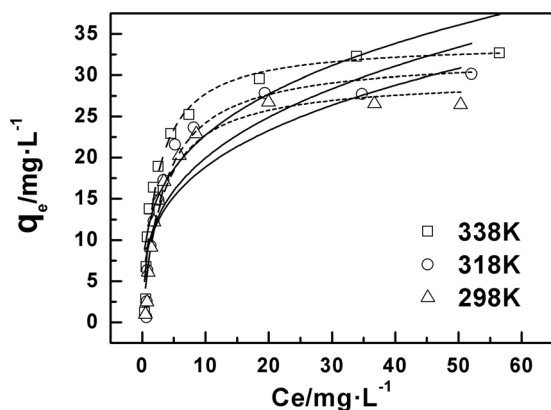

**Figure 7. Adsorption isotherms of Cu(II) on oMWCNTs at three different temperatures,  $m/V = 0.5$  g/L,  $pH = 4.00 \pm 0.05$ ,  $I = 0.01$  mol/L NaCl,  $[Cu^{2+}]_{initial} = 1.87 \times 10^{-4}$  mol/L.** Symbols denote experimental data, dotted lines represent the model fitting to the Langmuir equation, solid lines represent the model fitting to the Freundlich equation.

doi:10.1371/journal.pone.0072475.g007

Where  $q_e$  (mg/g) and  $c_e$  (mg/L) represents the concentration of the metal ions in the solid and liquid phases at equilibrium adsorption, respectively;  $K_L$  (L/g) is the adsorption equilibrium constant;  $q_{max}$  (mg/g) is the maximum adsorption capacity of the metal ion.

The general form of the Freundlich model is:

$$q_e = K_F C_e^n \quad (3)$$

Where  $q_e$  (mg/g) represents the adsorption amount of the metal ions in the unit mass of oMWCNTs;  $c_e$  (mg/L) is the equilibrium aqueous concentration;  $K_F$  and  $n$  are the adsorption capacity and strength in the Freundlich equilibrium constants, respectively.

The adsorption isotherm resulting from the two models above are shown in Figure 7. The obtained fitting parameters are listed in Table 2. The correlation coefficient of the Langmuir model is greater than that of Freundlich model. Therefore the Langmuir model fit better explains the Cu(II) adsorption data as compared with the Freundlich model. This is consistent with literature results that the adsorption of Cu(II) on the other materials best fit the Langmuir model [53,54]. The results of Figure 7 also indicate that the adsorption capacity of oMWCNTs is larger when the temperature is higher, so the reaction is more likely to occur at higher temperatures. Moreover, the thermodynamic parameters of  $\Delta H$ ,  $\Delta G$ , and  $\Delta S$  obtained from different adsorption isotherms are shown in Table 3. As seen in Table 3,  $\Delta H > 0$  indicates that the adsorption reaction is endothermic;  $\Delta G < 0$ , shows that the adsorption reaction is a spontaneous process. Therefore, high temperature is advantageous and promotes adsorption.

#### Influence of $C_{60}(OH)_n$ on the adsorption of Cu(II) onto oMWCNTs

The pH-dependent Cu(II) adsorption onto oMWCNTs in the absence and presence of  $C_{60}(OH)_n$  is given in Figure 8. One can see that  $C_{60}(OH)_n$  has almost no effect on Cu(II) adsorption on the surface of oMWCNTs at its lower concentration (i.e. 5 mg/L), but the adsorption of Cu(II) onto oMWCNTs decreases with increasing concentration of  $C_{60}(OH)_n$ . When the concentration of  $C_{60}(OH)_n$  is 125 mg/L, the adsorption of Cu(II) onto oMWCNTs increases from approximate 26% at pH 3, to nearly 71% at pH 5.4 and decreases to 50% at pH 7.5. When adding 250

**Table 2. The parameters of Langmuir and Freundlich fitting of Cu(II) adsorption on oMWCNTs.**

| $T(K)$ | Langmuir constants              |      |       | Freundlich constants                                        |      |       |
|--------|---------------------------------|------|-------|-------------------------------------------------------------|------|-------|
|        | $q_{max}$ (mg·g <sup>-1</sup> ) | $b$  | $R^2$ | $K_f$ (mg <sup>1-n</sup> ·L <sup>n</sup> ·g <sup>-1</sup> ) | $n$  | $R^2$ |
| 298    | 29.69                           | 0.33 | 0.962 | 9.34                                                        | 0.31 | 0.788 |
| 318    | 32.31                           | 0.29 | 0.957 | 9.54                                                        | 0.32 | 0.805 |
| 338    | 33.97                           | 0.44 | 0.965 | 11.72                                                       | 0.29 | 0.824 |

doi:10.1371/journal.pone.0072475.t002

mg/L  $C_{60}(OH)_n$ , the adsorption of Cu(II) is lower than when 125 mg/L  $C_{60}(OH)_n$  is added. The adsorption of Cu(II) on oMWCNTs increases from nearly 16% at pH 3, to approximately 57% at pH 5.4 and decreases to 20% at pH 7.5. This indicates that  $C_{60}(OH)_n$  inhibits the adsorption of Cu(II) on oMWCNTs. Nonetheless, it can also be seen from Figure 8 that the adsorption of Cu(II) on the oMWCNTs still increases as pH rises to pH of about 5, but sharply decreases with pH above 5 in the presence of  $C_{60}(OH)_n$ . According to the literature, the effect of organic species on metal adsorption on oMWCNTs is mainly attributed to the complexation between organic materials, metal ions, and surface functional groups of oMWCNTs by hydrophobic interaction, electrostatic attraction or repulsion, hydrogen bonding between the -OH and the tube surface -OH or -COOH groups, and  $\pi$ - $\pi$  interactions between the phenolics and the carbon nanotubes [20,55]. Generally, organic materials act as a "bridge" between metal ions and oMWCNTs to enhance the ability of oMWCNTs to adsorb Cu(II) from the solution. According to this explanation, if the interaction between  $C_{60}(OH)_n$ , metal ions, and oMWCNTs occurs, the adsorption of Cu(II) would increase due to the formation of three component complexation. However, this phenomenon does not appear in Figure 8. Moreover, this deduction does not explain why the addition of Cu(II) and  $C_{60}(OH)_n$  do not affect the adsorption of Cu(II) and  $C_{60}(OH)_n$  onto oMWCNTs (Table S2 in File S1). Consequently, it is possible to exclude the potential role of  $C_{60}(OH)_n$  between Cu(II) and oMWCNTs. Two other possible reasons for the inhibition of  $C_{60}(OH)_n$  are as follows: (a) there is an interaction between  $C_{60}(OH)_n$  and Cu(II), and  $C_{60}(OH)_n$  is not adsorbed to oMWCNT surfaces, so that more Cu(II) is dissolved in solution, thus reducing the adsorption of Cu(II) on the oMWCNTs; (b)  $C_{60}(OH)_n$  is adsorbed onto oMWCNT surfaces, but it does not complex with Cu(II), because the competition of  $C_{60}(OH)_n$  and Cu(II) for adsorption sites of oMWCNTs surface, and the adsorbed Cu(II) on oMWCNTs is "squeezed" down by the adsorbed  $C_{60}(OH)_n$ , thus weakening the adsorption of Cu(II) to oMWCNTs. The first case assumes that  $C_{60}(OH)_n$  is not adsorbed on the surface of oMWCNTs, because the number of hydroxyl groups of  $C_{60}(OH)_n$  are more than that of oMWCNTs, and the complex degree of  $C_{60}(OH)_n$  with Cu(II) is greater than that of oMWCNTs with Cu(II). Therefore, the adsorbed Cu(II) on the oMWCNTs surface is in turn adsorbed to  $C_{60}(OH)_n$ . Because of the adsorption competition for the functional group of  $C_{60}(OH)_n$  and oMWCNTs, Cu(II) adsorption is reduced on oMWCNT surfaces. However, the adsorption of Cu(II) on oMWCNTs increases with increasing pH at acid pH values, and the first case cannot reasonably explain the experimental results; in addition, the TEM (Figure 1B) picture indicates that  $C_{60}(OH)_n$  is adsorbed on the surface of oMWCNTs; this is also a contradiction with the first assumption. Therefore, the first explanation can be ruled out.

**Table 3.** Values of thermodynamic parameters for the adsorption of Cu(II) onto oMWCNTs.

| $C_0(\text{mg}\cdot\text{L}^{-1})$ | $\Delta H^\circ(\text{KJ}\cdot\text{mol}^{-1})$ | $\Delta S^\circ(\text{J}\cdot\text{mol}^{-1}\cdot\text{K}^{-1})$ | $\Delta G^\circ(\text{KJ}\cdot\text{mol}^{-1})$ |        |        |
|------------------------------------|-------------------------------------------------|------------------------------------------------------------------|-------------------------------------------------|--------|--------|
|                                    |                                                 |                                                                  | 298K                                            | 318K   | 338K   |
| 4                                  | 11.83                                           | 112.19                                                           | -21.6                                           | -23.85 | -26.09 |
| 12                                 | 8.05                                            | 94.68                                                            | -20.16                                          | -22.06 | -23.95 |
| 16                                 | 5.11                                            | 82.63                                                            | -19.51                                          | -21.17 | -22.82 |
| 20                                 | 3.62                                            | 71.96                                                            | -17.82                                          | -19.26 | -20.7  |

doi:10.1371/journal.pone.0072475.t003

If  $C_{60}(\text{OH})_n$  and Cu(II) connect together due to complexation, the changing trend of Cu(II) on oMWCNTs either rises more than without  $C_{60}(\text{OH})_n$  or declines, but this is inconsistent with the experimental results. Therefore, the second explanation is obviously reasonable since higher concentrations of  $C_{60}(\text{OH})_n$  does not accelerate the Cu(II) adsorption on the oMWCNTs surface. Figure 9 illustrates that the concentration of background electrolyte has no significant affect on the adsorption of Cu(II) on oMWCNTs in the presence of  $C_{60}(\text{OH})_n$ . This indicates that  $C_{60}(\text{OH})_n$  does not interact with  $\text{Na}^+$  in the background solution. It also verifies that the interaction between  $C_{60}(\text{OH})_n$  and the metal ions does not occur when adding  $C_{60}(\text{OH})_n$ . The presence of  $\pi$ - $\pi$  stacking interactions are supportive of the sorption of aromatic  $C_{60}(\text{OH})_n$  to the benzene rings of the MWCNT sidewalls. Besides, electron-donating (OH) constituents on  $C_{60}(\text{OH})_n$  can enhance its adsorption rate onto oMWCNTs. The dissociation constants ( $pK_a$ ) of  $C_{60}(\text{OH})_n$  (organic base) and  $C_{60}(\text{C}(\text{COOH})_2)_n$  (organic acid) are shown in Table S1 in File S1. When  $\text{pH} < pK_a$ , the non-dissociated species and the dissociated species are dominated by organic acids and organic bases, respectively; meanwhile, the hydroxyl groups of oMWCNTs carry positive charges due to protonation ( $\text{pH} < \text{pH}_{\text{pzc}}$ ). The deprotonation of functional groups on oMWCNT surface decreases with increasing pH due to deprotonation of  $C_{60}(\text{OH})_n$ . Thus the adsorption of Cu(II) on oMWCNTs rises slowly with increasing pH due to the competition of  $\text{H}^+$  and  $\text{Cu}^{2+}$  for the sorption site on oMWCNTs at  $\text{pH} < 4.6$ . More and more negative  $C_{60}(\text{OH})_n$  are adsorbed onto oMWCNTs due to its greater electron donating effect of  $-\text{O}^-$  at  $\text{pH} > 4.6$ , thus resulting in the enhancement of space hindrance effect of oMWCNTs. Additionally,  $\pi$ - $\pi$  stacking interactions are stronger than chemical complexation, and the increasing adsorption of  $C_{60}(\text{OH})_n$  on oMWCNTs also “squeezes” down Cu(II) adsorption leading to further decline. In short, the adsorption of  $C_{60}(\text{OH})_n$  onto oMWCNTs affects the surface characteristics and sorption sites, resulting in the observed changes of Cu(II) adsorbed on oMWCNTs.

To further investigate the adsorption process of  $C_{60}(\text{OH})_n$  and Cu(II) onto oMWCNTs, the adsorption of Cu(II) onto oMWCNTs as a function of: 1) the initial concentration of  $C_{60}(\text{OH})_n$  at different ratios of solid to liquid; and 2) the initial concentrations of Cu(II), are shown in Figure 10 and Figure 11. As can be seen from Figure 10 and 11,  $C_{60}(\text{OH})_n$  has almost no influence on Cu(II) adsorption at low concentration. Whereas, it starts to inhibit the adsorption ability of oMWCNTs for Cu(II) when the concentration of  $C_{60}(\text{OH})_n$  is higher than 50 mg/L. Figure 10 shows that when the initial concentration of Cu(II) is  $1.87 \times 10^{-4}$  mol/L, its adsorption percentage on the oMWCNTs decreases from about 94% to about 45%; the Cu(II) adsorption decreases from  $\sim 93\%$  to 27% at  $9.44 \times 10^{-5}$  mol/L. When the initial Cu(II) concentration becomes  $3.31 \times 10^{-5}$  mol/L, the

adsorption percentage drops from 91% to 3%. In other words, the Cu(II) adsorption percentage decreases regularly as the initial concentration of Cu(II) is reduced. This also shows that the Cu(II) is only adsorbed on oMWCNT surfaces, and has no interaction with  $C_{60}(\text{OH})_n$ . Figure 11 illustrates that when the dosage of oMWCNTs are 0.25 g/L and 0.1 g/L and the concentration of  $C_{60}(\text{OH})_n$  is less than 100 mg/L, the adsorption of Cu(II) on oMWCNTs falls sharply. The reduction of Cu(II) adsorption becomes mild when the concentration of  $C_{60}(\text{OH})_n$  is higher than 100 mg/L. This indicates that the low concentration of oMWCNTs does not offer enough available sites for the adsorption of  $C_{60}(\text{OH})_n$ , but with the increasing dosage of oMWCNTs, the available adsorption sites on oMWCNTs surfaces gradually increase, leading to more and more  $C_{60}(\text{OH})_n$  adsorption. Consequently, adsorption of Cu(II) on oMWCNTs decreases sharply.

Figure 8 shows that the adsorption of Cu(II) declines rapidly as the pH rises when the concentration of  $C_{60}(\text{OH})_n$  is more than 100 mg/L, whereas  $C_{60}(\text{OH})_n$  suppresses the Cu(II) adsorption after its concentration exceeds a critical value. This indicates that there might be two different  $C_{60}(\text{OH})_n$  binding sites on oMWCNTs surfaces. Carbon nanotubes are composed of hexagonal carbon rings and MWCNTs are mainly comprised of dozens of layers of coaxial tubes. Aromatic  $C_{60}(\text{OH})_n$  could connect with the sidewalls of oMWCNTs through  $\pi$ - $\pi$  stacking interactions. However, according to the literature [56], the walls of carbon nanotubes are not completely composed of hexatomic rings, wherein some of the hybridized carbon atoms can easily be

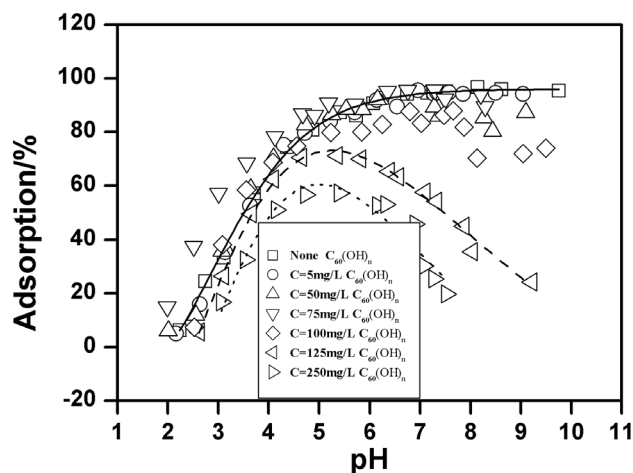

**Figure 8.** Effect of  $C_{60}(\text{OH})_n$  on Cu(II) adsorption on oMWCNTs as a function of pH,  $m/V = 0.5$  g/L,  $T = 25 \pm 1^\circ\text{C}$ ,  $I = 0.01$  mol/L NaCl,  $C[\text{Cu}^{2+}]_{\text{initial}} = 1.87 \times 10^{-4}$  mol/L.

doi:10.1371/journal.pone.0072475.g008

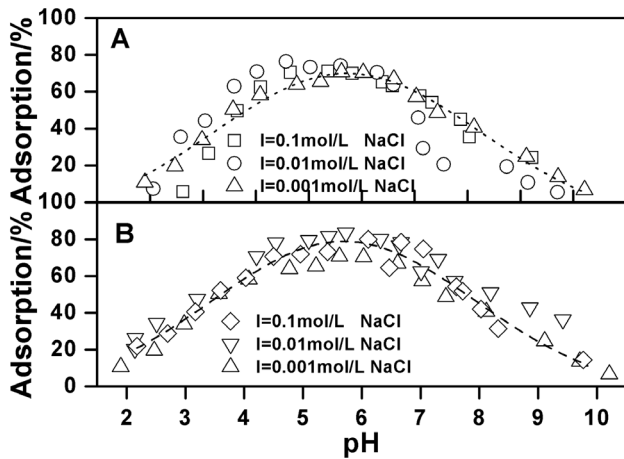

**Figure 9.** Effect of  $C_{60(OH)_n}$  on Cu(II) adsorption on oMWCNTs as a function of pH at different ionic strength,  $m/V = 0.5 \text{ g/L}$ ,  $T = 25 \pm 1^\circ \text{C}$ ,  $C[\text{Cu}^{2+}]_{\text{initial}} = 1.87 \times 10^{-4} \text{ mol/L}$ , (A)  $C[C_{60(OH)_n}] = 125 \text{ mg/L}$ ; (B)  $C[C_{60(OH)_n}] = 250 \text{ mg/L}$ . doi:10.1371/journal.pone.0072475.g009

modified. The  $\pi$  electron mobility of this hybrid ring is lower than that of a complete hexatomic ring. And the  $\pi$ - $\pi$  stacking interaction capability of the hybrid ring is relatively weak. Therefore, we ascribe the hexatomic ring on the sidewalls of oMWCNTs as the first binding site of  $C_{60(OH)_n}$ , also known as the strong adsorption sites. We designate the heterol ring of oMWCNTs as the second binding site, also referred to as the weak adsorption sites.  $C_{60(OH)_n}$  is adsorbed on the first adsorption site of oMWCNTs by the strong  $\pi$ - $\pi$  interaction at low concentration. The adsorption of Cu(II) mainly occurs with the surface functional groups of oMWCNTs through chemical complexation [57]. The adsorption of  $C_{60(OH)_n}$  and Cu(II) are independent processes. Therefore,  $C_{60(OH)_n}$  has no effect on the Cu(II) adsorption at its low concentration, but  $C_{60(OH)_n}$  begins to occupy the second binding site after the first adsorption sites are saturated as its concentration increases. Then the adsorbed Cu(II) ions are repelled by the space steric effect caused by the adsorbed  $C_{60(OH)_n}$ , thus the adsorption of Cu(II) begins to decrease.

The following assumptions can be made for modeling purposes: (1) there are two adsorption sites on oMWCNTs, the second binding site is defined as the common action sites for  $C_{60(OH)_n}$  and Cu(II) sorption; (2) the adsorption sites are uniformly distributed on oMWCNTs. Only monodentate binding is occurring at the binding sites (i.e., one cation per site).

The initial concentration of  $C_{60(OH)_n}$  is defined as  $C_f$  (mg/L); the adsorption saturation concentration of Cu(II) is  $C_p$  (mg/L); the adsorption amount of  $C_{60(OH)_n}$  on the second site of oMWCNTs is  $Q_f$  (mg/L); the adsorption reduction of Cu(II) on the second site is  $Q_c$  (mg/L); the adsorption percentage of Cu(II) on oMWCNTs are as follows:

$$q_e = (C_0 - C_e) \times \frac{V}{m} \quad (4)$$

$$\text{Adsorption}\% = \frac{q_e}{C_0} \times \frac{m}{V} \quad (5)$$

Where  $C_0$  (mg/L) is the initial concentration of Cu(II) before adsorption;  $q_e$  (mg/g) represents the equilibrium concentration of

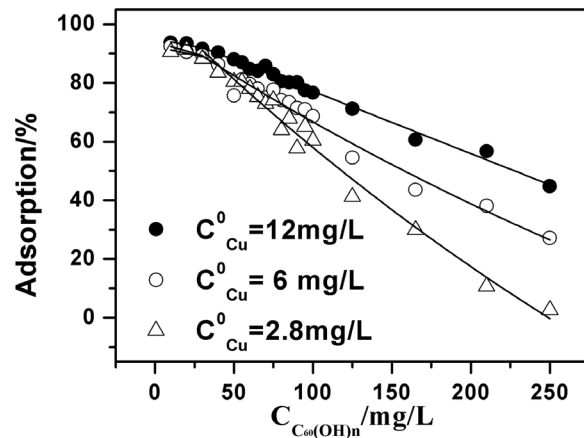

**Figure 10.** Effect of Cu(II) initial concentrations on Cu(II) adsorption onto oMWCNTs as a function of  $C_{60(OH)_n}$  initial concentrations,  $m/V = 0.5 \text{ g/L}$ ,  $\text{pH} = 7.00 \pm 0.10$ ,  $I = 0.01 \text{ mol/L NaCl}$ ,  $T = 25 \pm 1^\circ \text{C}$ . doi:10.1371/journal.pone.0072475.g010

Cu(II) in the solid phase after adsorption;  $C_e$  (mg/L) is the equilibrium concentration of Cu(II) in the liquid phase.

When  $C_e < C_p$ , the adsorption of Cu(II) and  $C_{60(OH)_n}$  are independent, the adsorption of Cu(II) does not vary with changes of  $C_{60(OH)_n}$ . Therefore,

$$A\% = (C_0 - C_e) / C_0 \quad (6)$$

$C_e > C_p$ , indicates that the adsorbed Cu(II) is transferred to the solution from the surface of oMWCNTs.  $C_e$  has a relationship with the adsorption of  $C_{60(OH)_n}$ . According to the assumptions mentioned above, the increasing rate of adsorption of  $C_{60(OH)_n}$  on the second adsorption sites on oMWCNTs is  $\Delta Q_f / \Delta t$  (because the adsorption rate of  $C_{60(OH)_n}$  is related to its initial concentration, we denote  $\Delta Q_f = \Delta b \times \Delta C_f$ ; where  $\Delta b$  is the parameter for characterization of the adsorption of  $C_{60(OH)_n}$ , it depends on the species and surface character of  $C_{60(OH)_n}$  and the nature of oMWCNTs. Meanwhile, the adsorption of Cu(II) is reduced with the adsorption of  $C_{60(OH)_n}$ . Then the decreasing

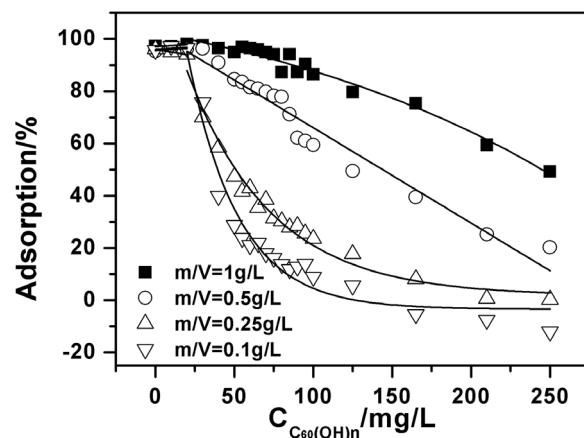

**Figure 11.** Effect of oMWCNTs dosage on Cu(II) adsorption onto oMWCNTs as a function of  $C_{60(OH)_n}$  initial concentrations,  $\text{pH} = 7.00 \pm 0.10$ ,  $I = 0.01 \text{ mol/L NaCl}$ ,  $T = 25 \pm 1^\circ \text{C}$ ,  $C[\text{Cu}^{2+}]_{\text{initial}} = 12 \text{ mg/L}$ . doi:10.1371/journal.pone.0072475.g011



**Table 4.** Parameters of double adsorption site model.

| double adsorption site model       |                   |                    |            |        |
|------------------------------------|-------------------|--------------------|------------|--------|
| $m/V(\text{g}\cdot\text{L}^{-1})$  | $C_2/C_0$         | $e^{C_1}/C_0$      | $k\cdot b$ | $R^2$  |
| 1                                  | 128.23            | -25.71             | -220.12    | 0.9698 |
| 0.5                                | $1.12\times 10^7$ | $-1.12\times 10^7$ | -          | 0.9523 |
| 0.25                               | 1.72              | 125.31             | 53.38      | 0.9786 |
| 0.1                                | -3.39             | 184.26             | 31.84      | 0.9555 |
| double adsorption site model       |                   |                    |            |        |
| $C_0(\text{mg}\cdot\text{L}^{-1})$ | $C_2/C_0$         | $e^{C_1}/C_0$      | $k\cdot b$ | $R^2$  |
| 12                                 | 3.29              | -3.29              | -1.55      | 0.9885 |
| 6                                  | -115.59           | 215.25             | 602.01     | 0.9705 |
| 2.9                                | -186.85           | 293.53             | 551.47     | 0.9805 |

doi:10.1371/journal.pone.0072475.t004

rate of Cu(II) is  $-\Delta Q_c/\Delta t$ . The increasing rate of  $C_{60}(\text{OH})_n$  adsorption on oMWCNTs is equal to the decreasing rate of Cu(II) adsorption. As illustrated in Figure 10, the decreasing rate of Cu(II) is slower with higher concentration. This means the squeezed capacity of  $C_{60}(\text{OH})_n$  for the adsorbed Cu(II) is relatively weaker at the high concentration of Cu(II). When the adsorption of  $C_{60}(\text{OH})_n$  and the reduction of Cu(II) reaches equilibrium, it can be expressed by the following expressions:

$$\frac{\Delta Q_f}{\Delta t} = -k \times \frac{1}{(C_0 - Q_c)} \times \frac{\Delta Q_c}{\Delta t} \quad (7)$$

$$Q_c = C_0 - e^{(k\cdot b\cdot C_f + C_1)} - C_2 \quad (8)$$

Therefore,

$$A\% = \frac{C_2}{C_0} + \frac{e^{C_1}}{C_0} \times e^{(k\cdot b\cdot C_f)} \quad (9)$$

When  $C_f = 0$ ,

$$A\% = \frac{C_2 + e^{C_1}}{C_0} \quad (10)$$

When  $C_f \rightarrow \infty$ ,

$$A\% = \frac{C_2}{C_0} = 0$$

$$\Rightarrow C_2 = 0 \quad (11)$$

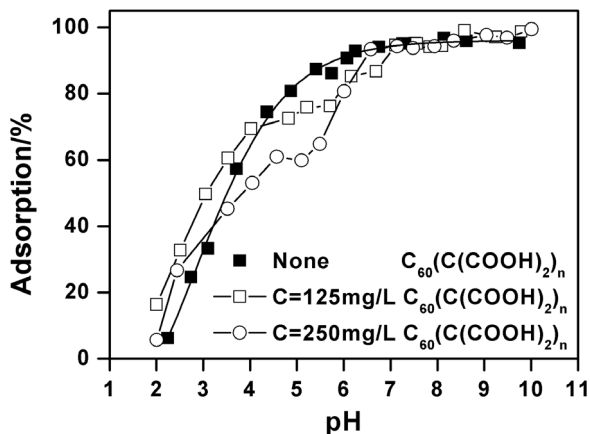

**Figure 12.** Effect of  $C_{60}(\text{COOH})_{2n}$  on Cu(II) adsorption onto oMWCNTs as a function of pH,  $m/V = 0.5 \text{ g/L}$ ,  $T = 25 \pm 1^\circ\text{C}$ ,  $I = 0.01 \text{ mol/L NaCl}$ ,  $C[\text{Cu}^{2+}]_{\text{initial}} = 1.87 \times 10^{-4} \text{ mol/L}$ . doi:10.1371/journal.pone.0072475.g012

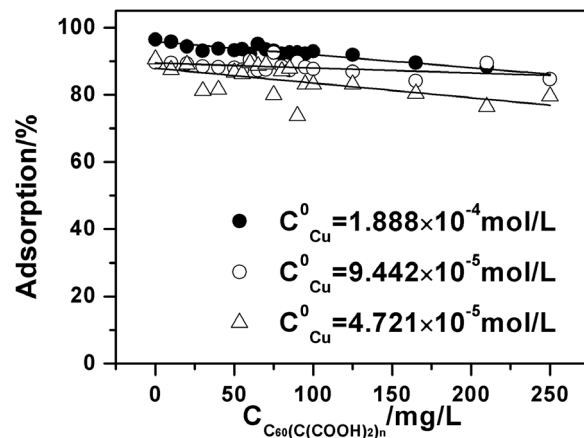

**Figure 13.** Effect of Cu(II) initial concentrations on Cu(II) adsorption onto oMWCNTs as a function of  $C_{60}(\text{COOH})_{2n}$  initial concentrations,  $m/V = 0.5 \text{ g/L}$ ,  $\text{pH} = 5.50 \pm 0.10$ ,  $I = 0.01 \text{ mol/L NaCl}$ ,  $T = 25 \pm 1^\circ\text{C}$ . doi:10.1371/journal.pone.0072475.g013

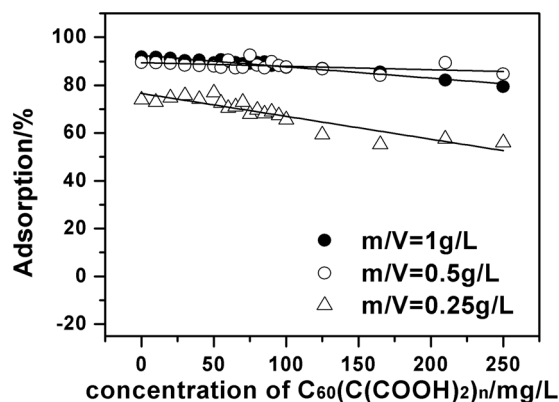

**Figure 14.** Effect of oMWCNTs dosage on Cu(II) adsorption onto oMWCNTs as a function of  $C_{60}(C(COOH)_2)_n$  initial concentrations,  $pH = 5.50 \pm 0.10$ ,  $I = 0.01$  mol/L NaCl,  $T = 25 \pm 1^\circ C$ ,  $C[Cu^{2+}]_{initial} = 1.87 \times 10^{-4}$  mol/L. doi:10.1371/journal.pone.0072475.g014

Substituting  $C_2 = 0$  to the above formulation (10), so:

$$A\% = \frac{e^{C_1}}{C_0}$$

$$\Rightarrow e^{C_1} = C_0 \times A\% = C_P$$

$$C_1 = \ln C_P \quad (12)$$

Given the above,  $C_2 = C_0 \times A\% \neq 0$ ; and together with  $C_1$  are the performance parameters for the sorption characterization of oMWCNTs. These parameters depend on the surface character of oMWCNTs and the nature and species of Cu(II);  $k$  represents the rate constant. We define this model as the double sorption site model (DSSM). Figure 10 and 11 presents the fitting curve based on the DSSM formulation. The fitting results are shown in Table 4. The  $R^2$  value shows that the adsorption isotherm of Cu(II) on oMWCNTs as a function of the initial concentration of  $C_{60}(OH)_n$  can be confidently simulated with the DSSM model.

#### Influence of $C_{60}(C(COOH)_2)_n$ on the adsorption of Cu(II)

Figure 12 illustrates the adsorption of Cu(II) on oMWCNTs as a function pH in the presence of  $C_{60}(C(COOH)_2)_n$ . The adsorption of Cu(II) declines at pH 4–6 due to the inhibition of  $C_{60}(C(COOH)_2)_n$ . Subsequently, Cu(II) adsorption gradually increases to a maximum and then remains stable.  $C_{60}(C(COOH)_2)_n$  can be excluded from the interaction between  $C_{60}(C(COOH)_2)_n$  and Cu(II) because there is no increasing adsorption of Cu(II). However, the adsorption mechanism of the combined impact of  $C_{60}(C(COOH)_2)_n$  and  $C_{60}(OH)_n$  behaves differently. Due to the protonation of  $C_{60}(C(COOH)_2)_n$ , the competition between  $H^+$  and  $Cu^{2+}$  for the adsorption site of oMWCNTs results in the declining adsorption of Cu(II) at pH 4–6. Because of the electron withdrawing effect of the carboxyl group on  $C_{60}(C(COOH)_2)_n$ , the  $\pi$ - $\pi$  stacking interactions of  $C_{60}(C(COOH)_2)_n$  with the oMWCNTs benzene ring are weakened. Moreover, the steric hindered reaction of  $C_{60}(C(COOH)_2)_n$  is stronger than that of  $C_{60}(OH)_n$ , and  $C_{60}(C(COOH)_2)_n$  cannot easily be adsorbed onto oMWCNTs like  $C_{60}(OH)_n$ . This may be

the reason why the TEM photos of the dispersion of oMWCNTs and  $C_{60}(C(COOH)_2)_n$  have not shown  $C_{60}(C(COOH)_2)_n$  connected to oMWCNT surfaces. Therefore, the increasing space hindrance effect of  $C_{60}(C(COOH)_2)_n$  reduces the  $C_{60}(C(COOH)_2)_n$  adsorption on oMWCNTs surfaces, and consequently Cu(II) adsorption on oMWCNTs gradually rises and then maintains steady state at  $pH > 6$ .

Likewise, the influence of  $C_{60}(C(COOH)_2)_n$  on Cu(II) adsorption onto oMWCNTs are evaluated at different initial concentrations of Cu(II) and concentration of oMWCNTs at  $pH 5.5 \pm 0.05$ . The results are shown in Figure 13 and Figure 14. The adsorbed Cu(II) reduces slightly with the increasing concentration of  $C_{60}(C(COOH)_2)_n$ . This shows that the inhibition mode of  $C_{60}(C(COOH)_2)_n$  and  $C_{60}(OH)_n$  are essentially different. Although  $C_{60}(C(COOH)_2)_n$  and  $C_{60}(OH)_n$  can be adsorbed to the sidewalls of oMWCNTs by the  $\pi$ - $\pi$  interaction, the species and the connecting styles of surface functional groups introduced on  $C_{60}$  vary from each other, leading to declining Cu(II) adsorption on the surface of oMWCNTs to varying degrees.

## Conclusions

The results of this work indicate that the adsorption of Cu(II) onto oMWCNTs is strongly pH dependent and weakly ion strength dependent. Chemical complexation is the main mechanism of Cu(II) adsorption to oMWCNTs. The negative effects of  $C_{60}(OH)_n$  and  $C_{60}(C(COOH)_2)_n$  on the adsorption of Cu(II) on oMWCNTs are completely different. The DSSM model simulates the adsorption isotherms of Cu(II) adsorption as a function of initial concentration of  $C_{60}(OH)_n$ . These results are important in understanding the transport of Cu(II) from two kinds of carbon nanomaterials and their behavior in the environment.

## Supporting Information

**File S1** Figure S1, FTIR spectrum of (A) oMWCNTs; (B) oMWCNTs+Cu(II); (C) oMWCNTs+Cu(II)+ $C_{60}(OH)_n$ ; (D) oMWCNTs+Cu(II)+ $C_{60}(C(COOH)_2)_n$ . Figure S2, Relative proportion of Cu(II) species as a function of pH;  $C[Cu^{2+}]_{initial} = 1.87 \times 10^{-4}$  mol·L<sup>-1</sup>,  $I = 0.01$  mol/L NaCl,  $T = 25 \pm 1^\circ C$ ,  $P_{CO_2} = 10^{-3.58}$  atm. Figure S3, Effect of  $C_{60}(OH)_n$  on the zeta potential of oMWCNTs. Figure S4, Effect of  $C_{60}(C(COOH)_2)_n$  on the zeta potential of oMWCNTs. Figure S5, The dispersibility of oMWCNTs after adding different concentration soluble fullerene: (A) single oMWCNTs; (B) oMWCNTs +10 mg  $C_{60}(C(COOH)_2)_n$ ; (C) oMWCNTs +100 mg  $C_{60}(C(COOH)_2)_n$ ; (D) oMWCNTs +1000 mg  $C_{60}(C(COOH)_2)_n$ ; (E) oMWCNTs +10 mg  $C_{60}(OH)_n$ ; (F) oMWCNTs + 100 mg  $C_{60}(OH)_n$ ; (G) oMWCNTs + 1000 mg  $C_{60}(OH)_n$ . Table S1, The parameters of  $C_{60}(C(COOH)_2)_n$  and  $C_{60}(OH)_n$  species. Table S2, The influence of adding order of species on Cu(II) sorption on oMWCNTs. Table S3, Constants for the kinetic adsorption of Cu(II) on oMWCNTs using different adsorption models. (DOCX)

## Acknowledgments

The author would like to thank Prof. Chung-King Liu from United States Department of Energy for revising the paper.

## Author Contributions

Conceived and designed the experiments: WW JW ZL. Performed the experiments: JW SL. Analyzed the data: JW ZL WQ. Contributed reagents/materials/analysis tools: JW SL PL FL YY L. Wu L. Wang. Wrote the paper: JW.

## References

- Heath JR (1999) Nanoscale materials. *Accounts of Chemical Research* 32: 388–388.
- Davoren M, Herzog E, Casey A, Cottineau B, Chambers G, et al. (2007) In vitro toxicity evaluation of single walled carbon nanotubes on human A549 lung cells. *Toxicology in Vitro* 21: 438–448.
- Hyung H, Fortner JD, Hughes JB, Kim J-H (2006) Natural Organic Matter Stabilizes Carbon Nanotubes in the Aqueous Phase. *Environmental Science & Technology* 41: 179–184.
- Abbaspour A, Izadyar A (2007) Carbon nanotube composite coated platinum electrode for detection of Cr(III) in real samples. *Talanta* 71: 887–892.
- Sitko R, Zawisza B, Malicka E (2012) Modification of carbon nanotubes for preconcentration, separation and determination of trace-metal ions. *TrAC Trends in Analytical Chemistry* 37: 22–31.
- Pyrzyńska K (2010) Carbon nanostructures for separation, preconcentration and speciation of metal ions. *TrAC Trends in Analytical Chemistry* 29: 718–727.
- Chao-Yin K (2009) Water purification of removal aqueous copper (II) by as-grown and modified multi-walled carbon nanotubes. *Desalination* 249: 781–785.
- Pyrzyńska K, Bystrzejewski M (2010) Comparative study of heavy metal ions sorption onto activated carbon, carbon nanotubes, and carbon-encapsulated magnetic nanoparticles. *Colloids and Surfaces A: Physicochemical and Engineering Aspects* 362: 102–109.
- Gao Z, Bandosz TJ, Zhao Z, Han M, Qiu J (2009) Investigation of factors affecting adsorption of transition metals on oxidized carbon nanotubes. *Journal of Hazardous Materials* 167: 357–365.
- Li Y, Liu F, Xia B, Du Q, Zhang P, et al. (2010) Removal of copper from aqueous solution by carbon nanotube/calcium alginate composites. *Journal of Hazardous Materials* 177: 876–880.
- Bystrzejewski M, Pyrzyńska K (2011) Kinetics of copper ions sorption onto activated carbon, carbon nanotubes and carbon-encapsulated magnetic nanoparticles. *Colloids and Surfaces A: Physicochemical and Engineering Aspects* 377: 402–408.
- Wu C-H (2007) Studies of the equilibrium and thermodynamics of the adsorption of Cu<sup>2+</sup> onto as-produced and modified carbon nanotubes. *Journal of Colloid and Interface Science* 311: 338–346.
- Li Y-H, Ding J, Luan Z, Di Z, Zhu Y, et al. (2003) Competitive adsorption of Pb<sup>2+</sup>, Cu<sup>2+</sup> and Cd<sup>2+</sup> ions from aqueous solutions by multiwalled carbon nanotubes. *Carbon* 41: 2787–2792.
- Rao GP, Lu C, Su F (2007) Sorption of divalent metal ions from aqueous solution by carbon nanotubes: A review. *Separation and Purification Technology* 58: 224–231.
- Pyrzyńska K (2008) Carbon Nanotubes as a New Solid-Phase Extraction Material for Removal and Enrichment of Organic Pollutants in Water. *Separation & Purification Reviews* 37: 372–389.
- Hyung H, Kim J-H (2008) Natural Organic Matter (NOM) Adsorption to Multi-Walled Carbon Nanotubes: Effect of NOM Characteristics and Water Quality Parameters. *Environmental Science & Technology* 42: 4416–4421.
- Chen GC, Shan X, Wang YS, Pei Z, Shen XE, et al. (2008) Effects of copper, lead, and cadmium on the sorption and desorption of atrazine onto and from carbon nanotubes. *Environmental Science & Technology* 42: 8297–8302.
- Chakrapani N, Zhang YM, Nayak SK, Moore JA, Carroll DL, et al. (2003) Chemisorption of Acetone on Carbon Nanotubes. *The Journal of Physical Chemistry B* 107: 9308–9311.
- Sheng G, Li J, Shao D, Hu J, Chen C, et al. (2010) Adsorption of copper(II) on multiwalled carbon nanotubes in the absence and presence of humic or fulvic acids. *Journal of Hazardous Materials* 178: 333–340.
- Tan X, Fang M, Chen C, Yu S, Wang X (2008) Counterion effects of nickel and sodium dodecylbenzene sulfonate adsorption to multiwalled carbon nanotubes in aqueous solution. *Carbon* 46: 1741–1750.
- Jia Z, Wang Z, Xu C, Liang J, Wei B, et al. (1999) Study on poly(methyl methacrylate)/carbon nanotube composites. *Materials Science and Engineering: A* 271: 395–400.
- Balasubramanian K, Burghard M (2005) Chemically Functionalized Carbon Nanotubes. *Small* 1: 180–192.
- Hussain CM, Saridara C, Mitra S (2008) Microtrapping characteristics of single and multi-walled carbon nanotubes. *Journal of Chromatography A* 1185: 161–166.
- Hirsch A, Chen Z, Jiao H (2000) Spherical Aromaticity in Ih Symmetrical Fullerenes: The 2(N+1)2 Rule. *Angewandte Chemie International Edition* 39: 3915–3917.
- Tagmatarchis N, Shinohara H (2001) Fullerenes in medicinal chemistry and their biological applications. *Mini Rev Med Chem* 1: 339–348.
- Chawla P, Chawla V, Maheshwari R, Saraf SA, Saraf SK (2010) Fullerenes: from carbon to nanomedicine. *Mini Rev Med Chem* 10: 662–677.
- Sardenberg RB, Teixeira CE, Pinheiro M, Figueiredo JM (2011) Nonlinear conductivity of fullerene aqueous solutions. *ACS Nano* 5: 2681–2686.
- Bühl M, Hirsch A (2001) Spherical aromaticity of fullerenes. *Chem Rev* 101: 1153–1183.
- Montes-Morán MA, Suárez D, Menéndez JA, Fuente E (2004) On the nature of basic sites on carbon surfaces: an overview. *Carbon* 42: 1219–1225.
- Li T, Li X, Huang K, Jiang H, Li J (1999) Synthesis and characterization of hydroxylated fullerene epoxide—an intermediate for forming fullerol. *Journal of Central South University of Technology* 6: 35–36.
- Ye C, Chen C, Chen Z, Meng H, Xing L, et al. (2006) In situ observation of C<sub>60</sub>(C(COOH)<sub>2</sub>)<sub>2</sub> interacting with living cells using fluorescence microscopy. *Chinese Science Bulletin* 51: 1060–1064.
- Avilés F, Cauich-Rodríguez JV, Moo-Tah L, May-Pat A, Vargas-Coronado R (2009) Evaluation of mild acid oxidation treatments for MWCNT functionalization. *Carbon* 47: 2970–2975.
- Lu C, Liu C, Rao GP (2008) Comparisons of sorbent cost for the removal of Ni<sup>2+</sup> from aqueous solution by carbon nanotubes and granular activated carbon. *Journal of Hazardous Materials* 151: 239–246.
- Xu J-Y, Han K, Li S-X, Cheng J-S, Xu G-T, et al. (2009) Pulmonary responses to polyhydroxylated fullerenols, C<sub>60</sub>(OH)<sub>x</sub>. *Journal of Applied Toxicology* 29: 578–584.
- Cheng F, Yang X, Zhu H, Sun J, Liu Y (2000) Synthesis of oligoadducts of malonic acid C<sub>60</sub> and their scavenging effects on hydroxyl radical. *Journal of Physics and Chemistry of Solids* 61: 1145–1148.
- Pardanaud C, Aréou E, Martin C, Ruffe R, Angot T, et al. (2012) Raman micro-spectroscopy as a tool to measure the absorption coefficient and the erosion rate of hydrogenated amorphous carbon films heat-treated under hydrogen bombardment. *Diamond and Related Materials* 22: 92–95.
- Hiura H, Ebbesen TW, Tanigaki K, Takahashi H (1993) Raman studies of carbon nanotubes. *Chemical Physics Letters* 202: 509–512.
- Ferrari A, Robertson J (2001) Resonant Raman spectroscopy of disordered, amorphous, and diamondlike carbon. *Physical Review B* 64: 075414.
- Xu D, Tan X, Chen C, Wang X (2008) Removal of Pb(II) from aqueous solution by oxidized multiwalled carbon nanotubes. *Journal of Hazardous Materials* 154: 407–416.
- Chen C, Li X, Zhao D, Tan X, Wang X (2007) Adsorption kinetic, thermodynamic and desorption studies of Th(IV) on oxidized multi-wall carbon nanotubes. *Colloids and Surfaces A: Physicochemical and Engineering Aspects* 302: 449–454.
- Ho YS (1995) Adsorption of heavy metals from waste streams by peat. Ph.D. Thesis. The University of Birmingham, Birmingham UK.
- Hu J, Chen C, Zhu X, Wang X (2009) Removal of chromium from aqueous solution by using oxidized multiwalled carbon nanotubes. *Journal of Hazardous Materials* 162: 1542–1550.
- Alkan M, Doğan M (2001) Adsorption of Copper(II) onto Perlite. *Journal of Colloid and Interface Science* 243: 280–291.
- Lee SM, Davis AP (2001) Removal of Cu(II) and Cd(II) from aqueous solution by seaweed processing waste sludge. *Water Research* 35: 534–540.
- Üçer A, Uyanik A, Aygün ŞF (2006) Adsorption of Cu(II), Cd(II), Zn(II), Mn(II) and Fe(III) ions by tannic acid immobilised activated carbon. *Separation and Purification Technology* 47: 113–118.
- Yang S, Li J, Shao D, Hu J, Wang X (2009) Adsorption of Ni(II) on oxidized multi-walled carbon nanotubes: Effect of contact time, pH, foreign ions and PAA. *Journal of Hazardous Materials* 166: 109–116.
- Chen C, Wang X (2006) Adsorption of Ni(II) from Aqueous Solution Using Oxidized Multiwall Carbon Nanotubes. *Industrial & Engineering Chemistry Research* 45: 9144–9149.
- Wang X, Chen C, Hu W, Ding A, Xu D, et al. (2005) Sorption of <sup>243</sup>Am(III) to Multiwall Carbon Nanotubes. *Environmental Science & Technology* 39: 2856–2860.
- Lu C, Chiu H (2006) Adsorption of zinc(II) from water with purified carbon nanotubes. *Chemical Engineering Science* 61: 1138–1145.
- Zhao D, Yang X, Zhang H, Chen C, Wang X (2010) Effect of environmental conditions on Pb(II) adsorption on β-MnO<sub>2</sub>. *Chemical Engineering Journal* 164: 49–55.
- Shi K, Wang X, Guo Z, Wang S, Wu W (2009) Se(IV) sorption on TiO<sub>2</sub>: Sorption kinetics and surface complexation modeling. *Colloids and Surfaces A: Physicochemical and Engineering Aspects* 349: 90–95.
- Hayes K F, Leckie J O (1987) Modeling ionic strength effects on cation adsorption at hydrous oxide/solution interfaces. *Journal of Colloid and Interface Science* 115: 564–572.
- Yavuz Ö, Altunkaynak Y, Güzel F (2003) Removal of copper, nickel, cobalt and manganese from aqueous solution by kaolinite. *Water Research* 37: 948–952.
- Wang X, Liang X, Wang Y, Wang X, Liu M, et al. (2011) Adsorption of Copper (II) onto activated carbons from sewage sludge by microwave-induced phosphoric acid and zinc chloride activation. *Desalination* 278: 231–237.
- Lin D, Xing B (2008) Adsorption of Phenolic Compounds by Carbon Nanotubes: Role of Aromaticity and Substitution of Hydroxyl Groups. *Environmental Science & Technology* 42: 7254–7259.
- Gauden PA, Terzyk AP, Rychlicki G, Kowalczyk P, Lota K, et al. (2006) Thermodynamic properties of benzene adsorbed in activated carbons and multi-walled carbon nanotubes. *Chemical Physics Letters* 421: 409–414.
- Di Z-C, Ding J, Peng X-J, Li Y-H, Luan Z-K, et al. (2006) Chromium adsorption by aligned carbon nanotubes supported ceria nanoparticles. *Chemosphere* 62: 861–865.
